# Supplementary material
Source: Springer Nature journal article supplement (https://www.springermedizin.de/resource/supplementary/12911_2006_165_MOESM1_ESM.pdf/9527276)

$\lambda_1$ 

Normal  
(State 1)

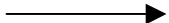

asymptomatic phase  
(State 2)

 $\lambda_2$ 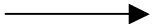

symptomatic phase  
(State 3)

Supplement: MOESM1 [file 9527276]
